# Supplementary material for: Preliminary Evaluation of the Use of Thermally-Dried Immobilized Kefir Cells in Low Alcohol Winemaking
Source: MDPI journal article supplement (doi:10.3390/app12126176), 2022-06-17
Supplement: s1 [file s1]

**Table S1.** Sensory evaluation of low alcohol wines produced by thermally-dried kefir culture at various temperatures (5-30 °C).

| Fermentation temperature (°C) | Low alcohol wine sample | Sensory attribute |         |                 |
|-------------------------------|-------------------------|-------------------|---------|-----------------|
|                               |                         | Aroma             | Taste   | Overall quality |
| 30                            | Fr                      | 3.1±0.8           | 3.1±0.8 | 2.8±0.5         |
|                               | Ap                      | 2.6±0.5           | 3.0±0.6 | 3.0±0.5         |
|                               | DCM                     | 3.4±0.5           | 3.6±0.4 | 3.8±0.7         |
|                               | GS                      | 2.4±0.5           | 3.3±0.4 | 3.5±0.7         |
| 20                            | Fr                      | 2.4±0.6           | 2.7±0.5 | 2.5±0.5         |
|                               | Ap                      | 2.7±0.7           | 2.9±0.2 | 2.7±0.5         |
|                               | DCM                     | 3.1±0.4           | 3.4±0.4 | 3.6±0.6         |
|                               | GS                      | 2.2±0.4           | 3.2±0.6 | 3.3±0.8         |
| 5                             | Fr                      | 1.7±0.5           | 2.9±0.6 | 1.9±0.4         |
|                               | Ap                      | 1.9±0.4           | 2.7±0.5 | 2.1±0.3         |
|                               | DCM                     | 2.7±0.5           | 3.0±0.5 | 2.7±0.7         |
|                               | GS                      | 2.1±0.3           | 3.1±0.7 | 2.0±0.5         |

Fr: low alcohol wine fermented by free kefir culture, Ap: low alcohol wine fermented by immobilized kefir culture on apple pieces, DCM: low alcohol wine fermented by immobilized kefir culture on delignified cellulosic material (DCM), GS: low alcohol wine fermented by immobilized kefir culture on grape skins
